# Supplementary material for: Two-dimensional inverse opal hydrogel for pH sensing
Source: Royal Society of Chemistry journal article supplement (doi:10.1039/c4an00939h), 2014-01-01
Supplement: c4an00939h1.pdf [file c4an00939h1.pdf]

Supporting information

**Two dimensional inverse opal hydrogel for pH sensing**

Fei Xue, Zihui Meng\*, Fenglian Qi, Min Xue\*, Fengyan Wang, Wei Chen, and Zequn Yan

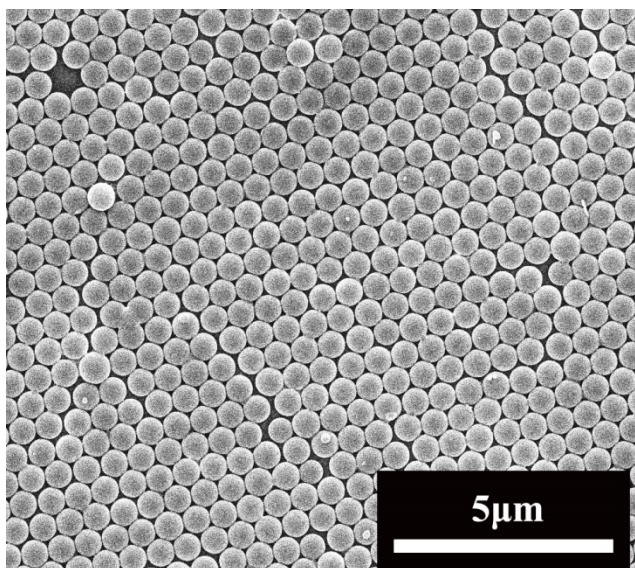

Figure 1. SEM image of the PS 2D colloidal array template

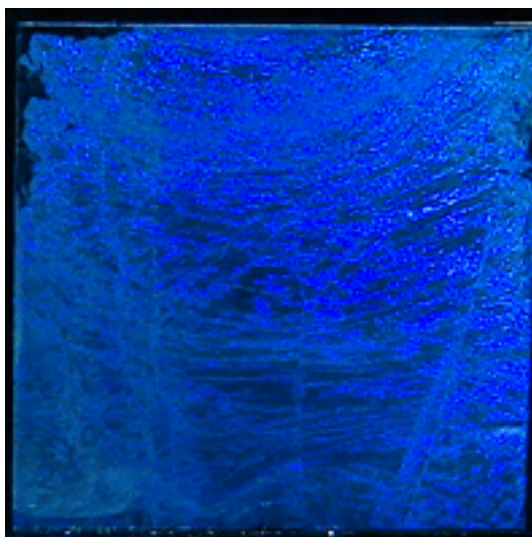

Figure 2. Diffraction color of the 2D PS colloidal array template
